# Supplementary material
Source: PubMed Central journal article supplement (PMC8261687)
Supplement: jamainternmed-e212790-s003.pdf [file jamainternmed-e212790-s003.pdf]

## **Data Sharing Statement**

Schwartz. Effect of Antibiotic-Prescribing Feedback to High-Volume Primary Care Physicians on Number of Antibiotic Prescriptions. *JAMA Intern Med*. Published July 06, 2021.  
doi:10.1001/jamainternmed.2021.2790

### **Data**

**Data available:** No
